# Supplementary material
Source: publisher figshare collection journal article supplement (https://acs.figshare.com/ndownloader/files/4851391)
Supplement: Supplementary file 1 [file 4851391]

**Supporting Information**

**Urinary Concentrations of Bisphenols and their Association with Biomarkers of Oxidative Stress in People Living Near E-waste Recycling Facilities in China**

Tao Zhang<sup>1\*</sup>, Jingchuan Xue<sup>2</sup>, Chuan-zi Gao<sup>1</sup>, Rong-liang Qiu<sup>1</sup>, Yan-xi Li<sup>1</sup>, Xiao Li<sup>1</sup>, Ming-zhi Huang<sup>3</sup>, Kurunthachalam Kannan<sup>2,4\*</sup>

<sup>1</sup> School of Environmental Science and Engineering, Guangdong Provincial Key Laboratory of Environmental Pollution Control and Remediation Technology, Sun Yat-sen University, Guangzhou 510275, PR China

<sup>2</sup> Wadsworth Center, New York State Department of Health, and Department of Environmental Health Sciences, School of Public Health, State University of New York at Albany, Albany, NY 12201, USA

<sup>3</sup> Department of Water Resources and Environment, Guangdong Provincial Key Laboratory of Urbanization and Geo-simulation, Sun Yat-sen University, Guangzhou 510275, PR China

<sup>4</sup> Biochemistry Department, Faculty of Science and Experimental Biochemistry Unit, King Fahd Medical Research Center, King Abdulaziz University, Jeddah, Saudi Arabia

**Corresponding author:**

**K. Kannan**

Wadsworth Center  
Empire State Plaza, PO Box 509  
Albany, NY 12201-0509  
Tel: +1-518-474-0015  
Fax: +1-518-473-2895  
E-mail: [kkannan@wadsworth.org](mailto:kkannan@wadsworth.org)

**Tao Zhang**

School of Environmental Science and Engineering, Sun Yat-Sen University  
135 Xingang West Street, Guangzhou, 510275, China  
Tel: 86-22-84113454  
Email: [zhangt47@mail.sysu.edu.cn](mailto:zhangt47@mail.sysu.edu.cn)

**Submission to: Environmental Science Technology**

**Supporting information including 5 pages which contains 2 tables and 1 figure.**

**Chemicals and Reagents.** Eight bisphenols, including bisphenol A [BPA; 2,2-bis(4-hydroxyphenyl)propane] (purity: 97%), bisphenol S (BPS; 4,4'-sulfonyldiphenol), bisphenol F (BPF; 4,4'-dihydroxydiphenylmethane), bisphenol P [BPP; 4,4'-(1,4-phenylenediisopropylidene)bisphenol; 99%], bisphenol Z [BPZ; 4,4'-cyclohexylidenebisphenol; 98%], bisphenol AF [BPAF; 4,4'-(hexafluoroisopropylidene)diphenol] (97%), and bisphenol AP [BPAP; 4,4'-(1-phenylethylidene)bisphenol; 99%] were obtained from Sigma-Aldrich (St. Louis, MO, USA); bisphenol B [BPB; 2,2-bis(4-hydroxyphenyl)butane] (98%) was purchased from TCI America (Portland, OR, USA). The molecular structures of bisphenols are shown in **Table S1**. Three internal standards, including  $^{13}\text{C}_{12}$ -labeled BPA (99%) and  $^{15}\text{N}_5$ -8-OHdG (> 98%) were purchased from Cambridge Isotope Laboratories (Andover, MA, USA); creatinine- $\text{d}_3$  ( $\geq 99\%$ ) was obtained from CDN Isotopes (Pointe-Claire, Quebec, Canada). HPLC grade ethyl acetate and methanol were from Mallinckrodt Baker (Phillipsburg, NJ, USA). Milli-Q water was provided through an ultrapure water system (Barnstead International, Dubuque, IA, USA).  $\beta$ -glucuronidase from *Helix pomatia* (145,700 units/mL  $\beta$ -glucuronidase; 887 units/mL sulfatase), 8-hydroxy-2'-deoxyguanosine (99%), creatinine ( $\geq 99\%$ ), acetic acid ( $\geq 99.7\%$ ), and ammonium acetate ( $\geq 98\%$ ) were purchased from Sigma-Aldrich (St. Louis, MO, USA).

**Table S1.** Tandem MS Parameters for the Analysis of Bisphenols.

| Molecular structures                                                                | Chemicals                          | MS/MS ion<br>(m/z) | Declustering<br>potential (V) | Entrance<br>potential<br>(V) | Collision<br>energy<br>(V) | Collision<br>cell exit<br>potential<br>(V) |
|-------------------------------------------------------------------------------------|------------------------------------|--------------------|-------------------------------|------------------------------|----------------------------|--------------------------------------------|
| 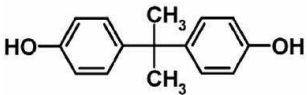   | BPA                                | 227 > 212          | -80                           | -12                          | -25                        | -5                                         |
|    | BPS                                | 249 > 108          | -40                           | -12                          | -30                        | -5                                         |
|    | BPF                                | 199 > 93           | -40                           | -12                          | -25                        | -5                                         |
|    | BPB                                | 241 > 212          | -40                           | -12                          | -25                        | -10                                        |
|  | BPZ                                | 267 > 173          | -40                           | -12                          | -32                        | -5                                         |
|  | BPP                                | 345 > 330          | -40                           | -12                          | -30                        | -10                                        |
|  | BPAP                               | 289 > 274          | -35                           | -12                          | -28                        | -10                                        |
|  | BPAF                               | 335 > 265          | -40                           | -12                          | -32                        | -5                                         |
|  | <sup>13</sup> C <sub>12</sub> -BPA | 239 > 92           | -80                           | -12                          | -25                        | -5                                         |

**Table S2.** Detailed Information of Subjects Recruited in This Study.

| sampling sites                   |                   | total      | age distribution |                 |                  |             | gender distribution |         | occupational distribution |                  |
|----------------------------------|-------------------|------------|------------------|-----------------|------------------|-------------|---------------------|---------|---------------------------|------------------|
|                                  |                   |            | 0 > -<br>6 yrs   | > 6 -<br>18 yrs | > 18 -<br>60 yrs | > 60<br>yrs | males               | females | OP <sup>d</sup>           | NOP <sup>e</sup> |
| <i>e-waste dismantling areas</i> | all <sup>a</sup>  | <b>116</b> | 14               | 28              | 60               | 14          | 66                  | 50      | 20                        | 96               |
|                                  | HDED <sup>b</sup> | <b>51</b>  | 6                | 13              | 25               | 7           | 28                  | 23      | 12                        | 39               |
|                                  | LDED <sup>c</sup> | <b>65</b>  | 8                | 15              | 35               | 7           | 38                  | 27      | 8                         | 57               |
| <i>rural reference area</i>      | all               | <b>22</b>  | 2                | 0               | 12               | 8           | 11                  | 11      | 0                         | 0                |
| <i>urban reference area</i>      | all               | <b>20</b>  | 0                | 0               | 20               | 0           | 9                   | 11      | 0                         | 0                |

<sup>a</sup> all: all participants from this area. <sup>b</sup> HDED: participants from high-density e-waste dismantling workshop area. <sup>c</sup> LDED: participants from low-density e-waste dismantling workshop area. <sup>d</sup> OP: occupational people. <sup>e</sup> NOP: non-occupational people.

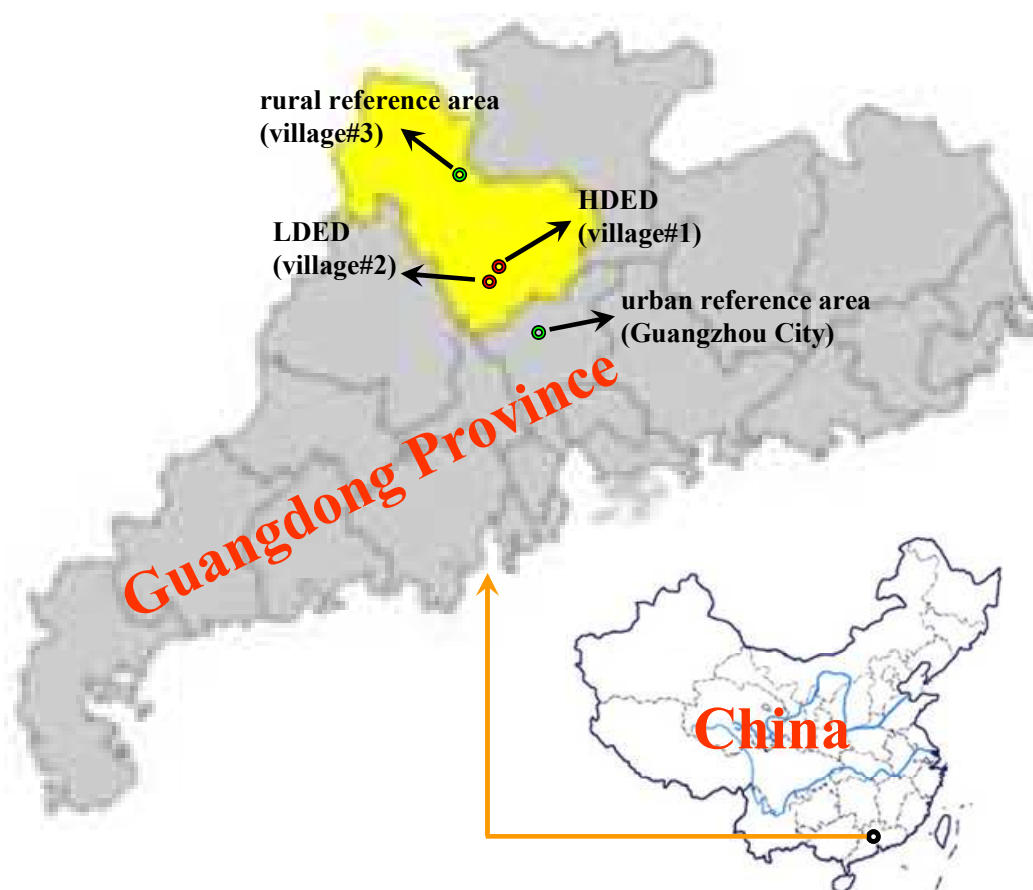

**Figure S1.** Sampling locations of samples collected from e-waste dismantling and two reference areas in Guangdong Province, China. Yellow background represents Qingyuan City; HDED and LDED represent high-density and low-density e-waste dismantling workshops area, respectively.
